# Supplementary material
Source: publisher figshare collection journal article supplement (https://tandf.figshare.com/ndownloader/files/40908159)
Supplement: Supplementary file 1 [file 40908159]

Supplementary material for Liu et al., “The combination of linagliptin and metformin rescues bone loss in type 2 diabetic osteoporosis”,  
*Journal of Drug Targeting*, 2023

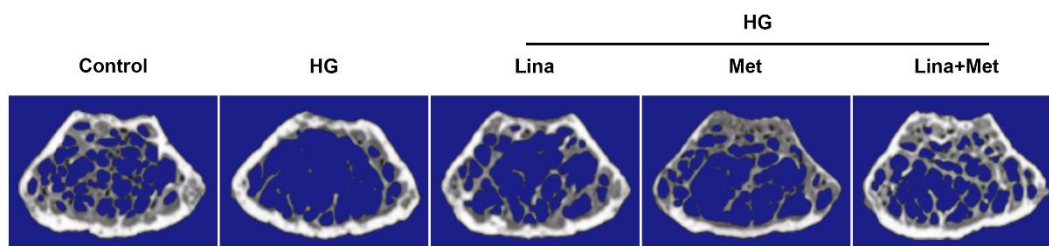

**Figure S1.** Representative bone micro-architecture images of femurs in type 2 diabetic osteoporosis rats with the treatment of linagliptin and metformin.

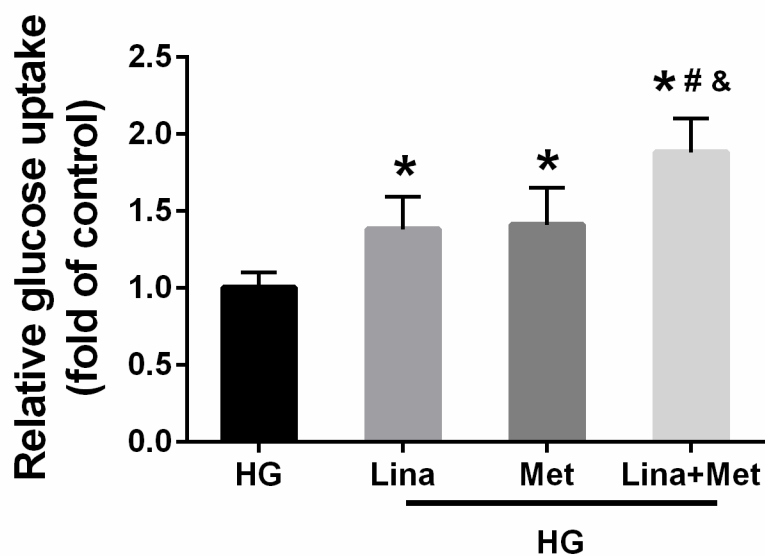

**Figure S2.** Linagliptin and metformin promoted glucose uptake of MC3T3-E1. Data was shown as mean  $\pm$  SD,  $n=3$ . \* $P < 0.05$  vs. HG treatment, # $P < 0.05$  vs. Lina group, & $P < 0.05$  vs. Met group.
